# Supplementary material
Source: publisher figshare collection journal article supplement (https://acs.figshare.com/ndownloader/files/7979242)
Supplement: Supplementary file 1 [file 7979242]

## Supporting Information for

# Simultaneous Single-Cell Analysis of Na<sup>+</sup>, K<sup>+</sup>, Ca<sup>2+</sup> and Mg<sup>2+</sup> in Nervous Cells in a Microfluidic System

Lu Li, Yuanyuan Fan, Qingling Li, Renjie Sheng, Haibin Si, Juan Fang, Lili Tong, Bo Tang\*

College of Chemistry, Chemical Engineering and Materials Science, Collaborative Innovation Center of Functionalized Probes for Chemical Imaging in Universities of Shandong, Key Laboratory of Molecular and Nano Probes, Ministry of Education, Institute of Molecular and Nano Science, Shandong Normal University, Jinan, 250014, P.R. China.

Author Email: tangb@sdu.edu.cn

Fax: 86-531-86180017

### Table of contents

1. The sampling process based on consecutive gated injection.
2. Fluorescent probe reactions with the four different ions.
3. Excitation and emission spectra of the fluorescent probes with the four different ions.
4. Selectivity of fluorescent probes for various metal ions.
5. Analytical performance of the proposed method.
6. Concentration distribution profile of the four ions in untreated PC-12 cells, pinadil-treated PC-12 cells and nifedipine-treated PC-12cells..
7. Cell viability of the A $\beta$ <sub>25-35</sub>-treated cells.
8. Concentrations of the four ions in untreated PC-12 cells and A $\beta$ <sub>25-35</sub>-treated PC-12 cells.
9. P-value calculated from the Shapiro-Wilk test
10. Na<sup>+</sup>/K<sup>+</sup>-ATPase activity assay.
11. Apoptosis Assay.

## 1. The sampling process based on consecutive gated injection.

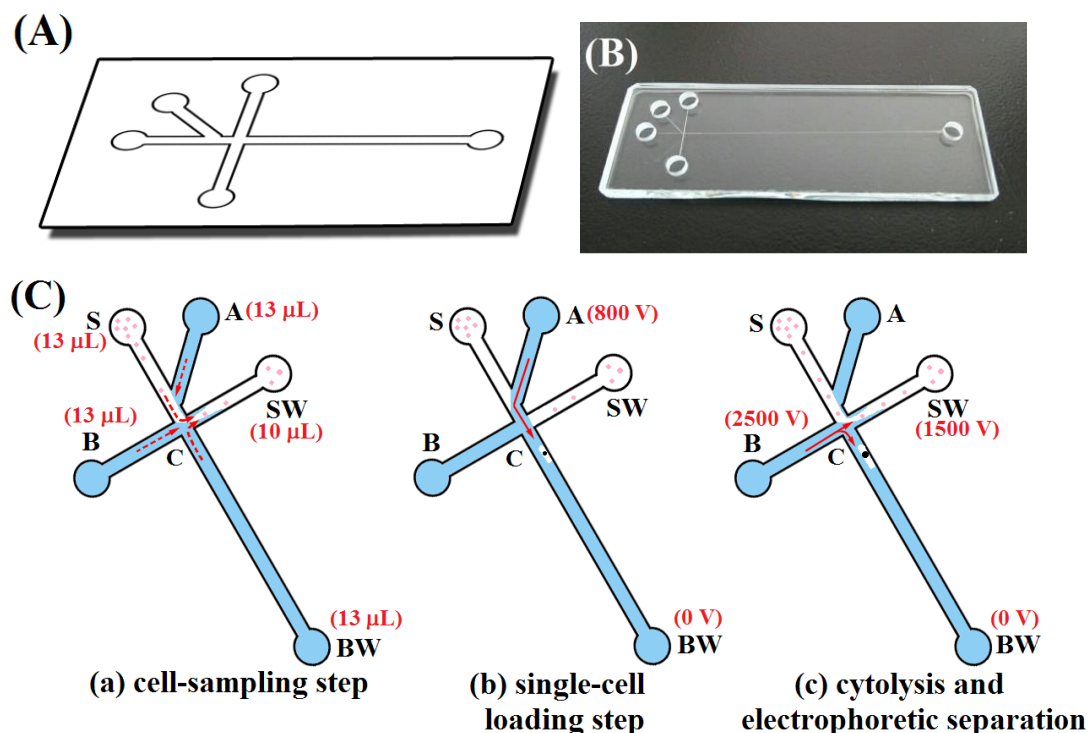

**Figure S1.** (A) The schematic diagram of the five-reservoir microchip. (B) The photos of the five-reservoir microchip. (C) The sampling process based on consecutive gated injection. (a), cell-sampling step; (b), single-cell loading step; (c), cytolysis and electrophoretic separation step.

Prior to the experiment, buffer (B), buffer waste (BW) and auxiliary (A) reservoirs were all filled with 13  $\mu\text{L}$  of electrophoresis running buffer, the sample waste (SW) reservoir was filled with 10  $\mu\text{L}$  of electrophoresis running buffer and the sample reservoir (S) was filled with 13  $\mu\text{L}$  of cell suspensions ( $5 \times 10^5$  cells/mL). Four Pt-electrodes were inserted into the reservoirs (B, BW, A and SW). Specifically, in the cell-sampling step, single cells in reservoir S entered into the sample channel, S–C, and flowed toward reservoir SW (Figure C a) because of hydrostatic pressure. Then, 800 V was applied to the auxiliary reservoirs A for 1 s. While the BW reservoir was grounded, one cell was loaded into the separation channel, C–BW (Figure C b). Next, the electricity was switched to the five reservoirs with B, SW, and BW at 2500, 1500, and 0 V, respectively, and with A and S floating for 44 s. At this time, cytolysis and electrophoretic separation were immediately conducted (Figure C c).

## 2. The reactions of the fluorescent probes with four different ions.

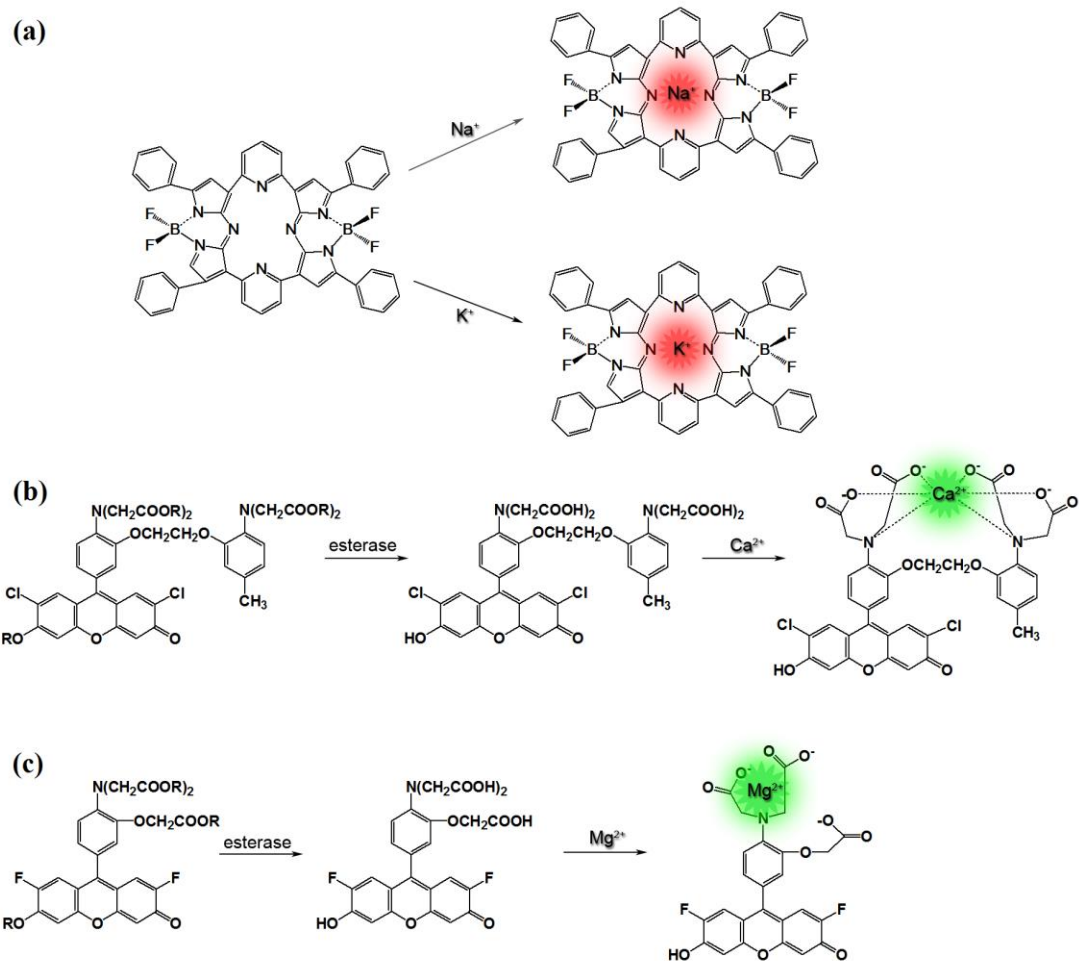

**Figure S2.** The reactions of cBDP with  $\text{Na}^+$  and  $\text{K}^+$  (a), Fluo-3 AM with  $\text{Ca}^{2+}$  (b), and Mag-Fluo-4 AM with  $\text{Mg}^{2+}$  (c).

### 3. Excitation and emission spectra of the fluorescent probes with the four metal ions.

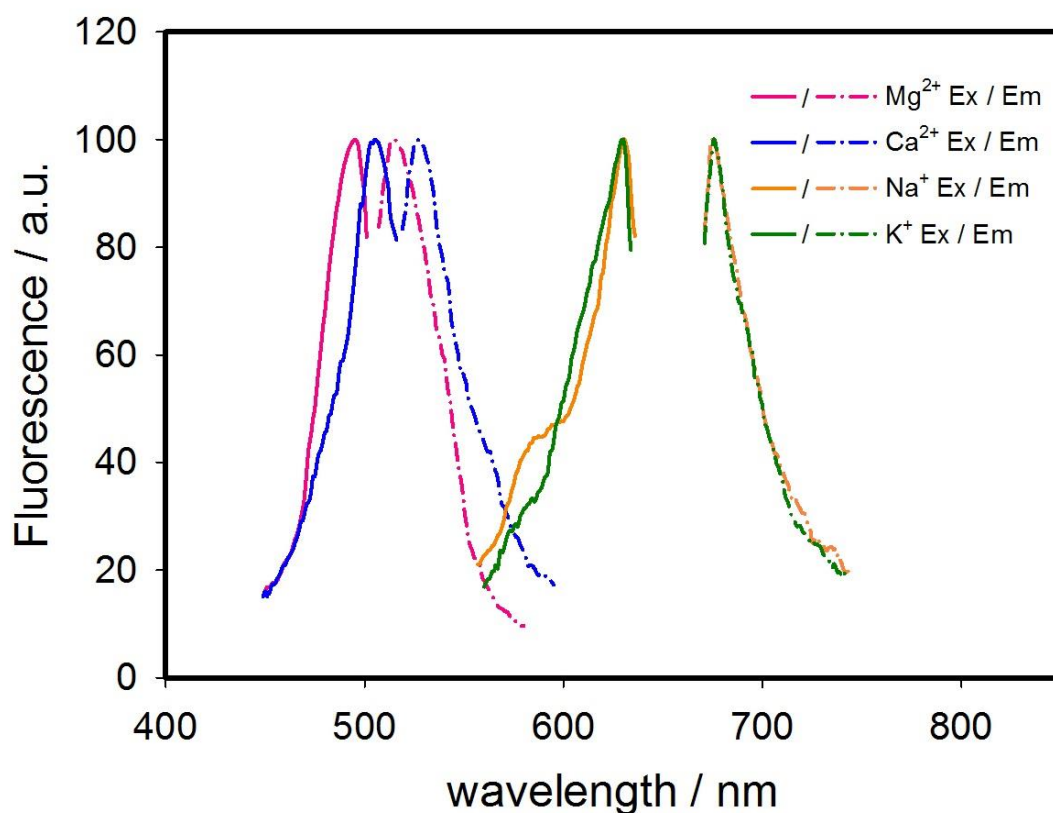

**Figure S3.** The excitation and emission spectra of cBDP with Na<sup>+</sup> or K<sup>+</sup>, Fluo-3 AM with Ca<sup>2+</sup> and Mag-Fluo-4 AM with Mg<sup>2+</sup>. The four ions were separately mixed with 60  $\mu$ M cBDP, 5  $\mu$ M Fluo-3 AM and 5  $\mu$ M Mag-Fluo-4 AM. The excitation and emission wavelength of the three probes and the corresponding laser and collected wavelength range are shown in Table 1.

**Table S1.** The selected laser and collected wavelength range for the different excitation (Ex) and emission (Em) wavelengths.

| Metal ions       | Ex / nm | Em / nm | Laser / nm | Collected wavelength / nm |
|------------------|---------|---------|------------|---------------------------|
| K <sup>+</sup>   | 630     | 676     | 633        | 695 $\pm$ 15              |
| Na <sup>+</sup>  | 630     | 675     |            |                           |
| Ca <sup>2+</sup> | 505     | 527     | 473        | 525 $\pm$ 15              |
| Mg <sup>2+</sup> | 495     | 515     |            |                           |

#### 4. Selectivity of fluorescent probes for various metal ions.

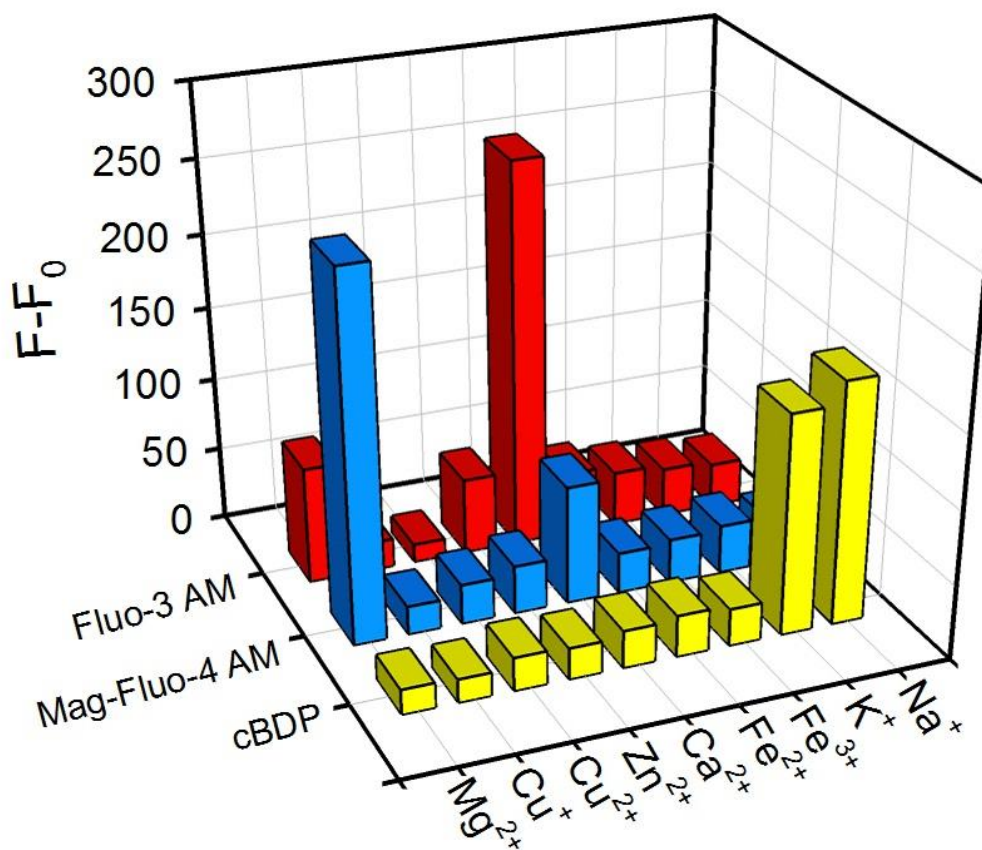

**Figure S4.** Selectivity of the cBDP, Mag-Fluo-4 AM and Fluo-3 AM probes for various metal ions. The fluorescence intensity was measured using metal ion-containing solutions (100  $\mu$ M) incubated with 5  $\mu$ M Fluo-3 AM (red), 5  $\mu$ M Mag-Fluo-4 AM (blue) and 60  $\mu$ M cBDP (yellow) respectively.

## 5. Analytical performance of the proposed Method.

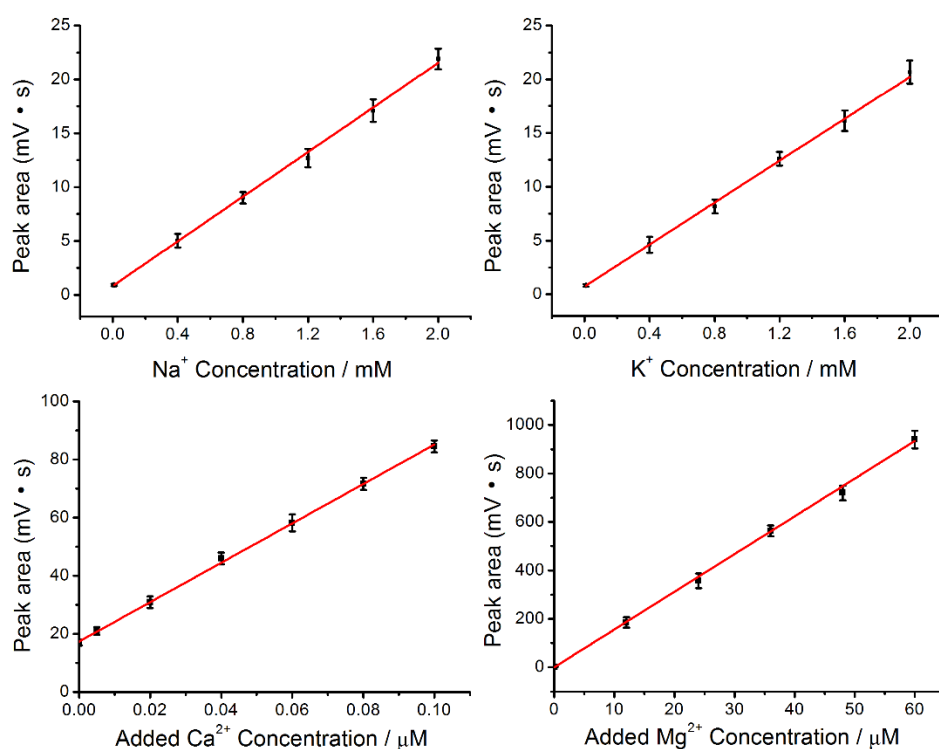

**Figure S5.** The calibration curves of Na<sup>+</sup>, K<sup>+</sup>, Ca<sup>2+</sup> and Mg<sup>2+</sup>. The concentrations of the Na<sup>+</sup> and K<sup>+</sup> standard solutions are 0.008 mM, 0.4 mM, 0.8 mM, 1.2 mM, 1.6 mM, 2 mM. The added Ca<sup>2+</sup> concentrations of standard solutions are 0.005 μm, 0.02 μm, 0.04 μm, 0.06 μm, 0.08 μm, 0.1 μm and the added Mg<sup>2+</sup> concentrations of standard solutions are 0.1 μm, 12 μm, 24 μm, 36 μm, 48 μm, 60 μm.

**Table S2.** Linearity, reproducibility of migration time and peak area, and LODs for Na<sup>+</sup>/K<sup>+</sup>-cBDP, Ca<sup>2+</sup>-Fluo-3 AM and Mg<sup>2+</sup>-Mag-Fluo-4 AM.

| Metal ions       | Linerity range    | Regression equation                                        | R <sup>2</sup> | RSD (% ,n=6)<br>(migration time) | RSD (% ,n=6)<br>(peak area) | LODs          |
|------------------|-------------------|------------------------------------------------------------|----------------|----------------------------------|-----------------------------|---------------|
| Na <sup>+</sup>  | 0.008-2<br>(mM)   | Y=0.833+10.2X<br>(linear concentration curve) <sup>a</sup> | 0.9993         | 0.60                             | 3.2                         | 0.293<br>fmol |
| K <sup>+</sup>   | 0.008-2<br>(mM)   | Y=0.707+9.69X<br>(linear concentration curve) <sup>a</sup> | 0.9992         | 0.53                             | 2.9                         | 0.316<br>fmol |
| Ca <sup>2+</sup> | 0.005-0.1<br>(μM) | Y=18.1+669X<br>(linear concentration curve) <sup>b</sup>   | 0.9992         | 0.72                             | 3.3                         | 0.158<br>amol |
| Mg <sup>2+</sup> | 0.1-60<br>(μM)    | Y=0.987+15.2X<br>(linear concentration curve) <sup>b</sup> | 0.9991         | 0.68                             | 3.5                         | 3.16<br>amol  |

[a] Y: peak area in mV s; X: concentration of the analyte in mM.

[b] Y: peak area in mV s; X: concentration of the analyte in μM.

The metal ions concentrations were quantified according to a linear equation from the calibration curves. Firstly, the fluorescence intensities of the four metal ions with different concentrations ( $\text{Na}^+$ , 0.008-2 mM;  $\text{K}^+$ , 0.008-2 mM;  $\text{Ca}^{2+}$ , 0.005-0.1  $\mu\text{M}$ ;  $\text{Mg}^{2+}$ , 0.1-60  $\mu\text{M}$ ) were measured. Then, four calibration curves with the peak areas as Y-axis and the concentrations of the metal ions as X-axis were obtained. For the single-cell quantitation, after the cell lysis, the fluorescence signals of the single cells were measured, the metal ions concentrations  $C_{\text{metal}}$  in the injection volume  $V_{\text{inj}}$  were calculated according to the linear equation from the calibration curves. The  $V_{\text{inj}}$  was measured to be 206 pL, which was considered as the volume of standard  $\text{Na}^+$ -cBDP solution in the microchannel when a detection in homogeneous solution with  $\text{Na}^+$ -cBDP was performed by the proposed sampling method. The amount of the metal ions  $n_{\text{metal}}$  in single cells were calculated according to the formula  $n_{\text{metal}}=C_{\text{metal}}\times V_{\text{inj}}$ . The concentrations of metal ions in single cells were obtained by multiply  $n_{\text{metal}}$  by an approximate cell volume 10 pL.

**6. Concentration distribution profiles of the four ions in untreated PC-12 cells, pinacidil-treated PC-12 cells and nifedipine-treated PC-12cells.**

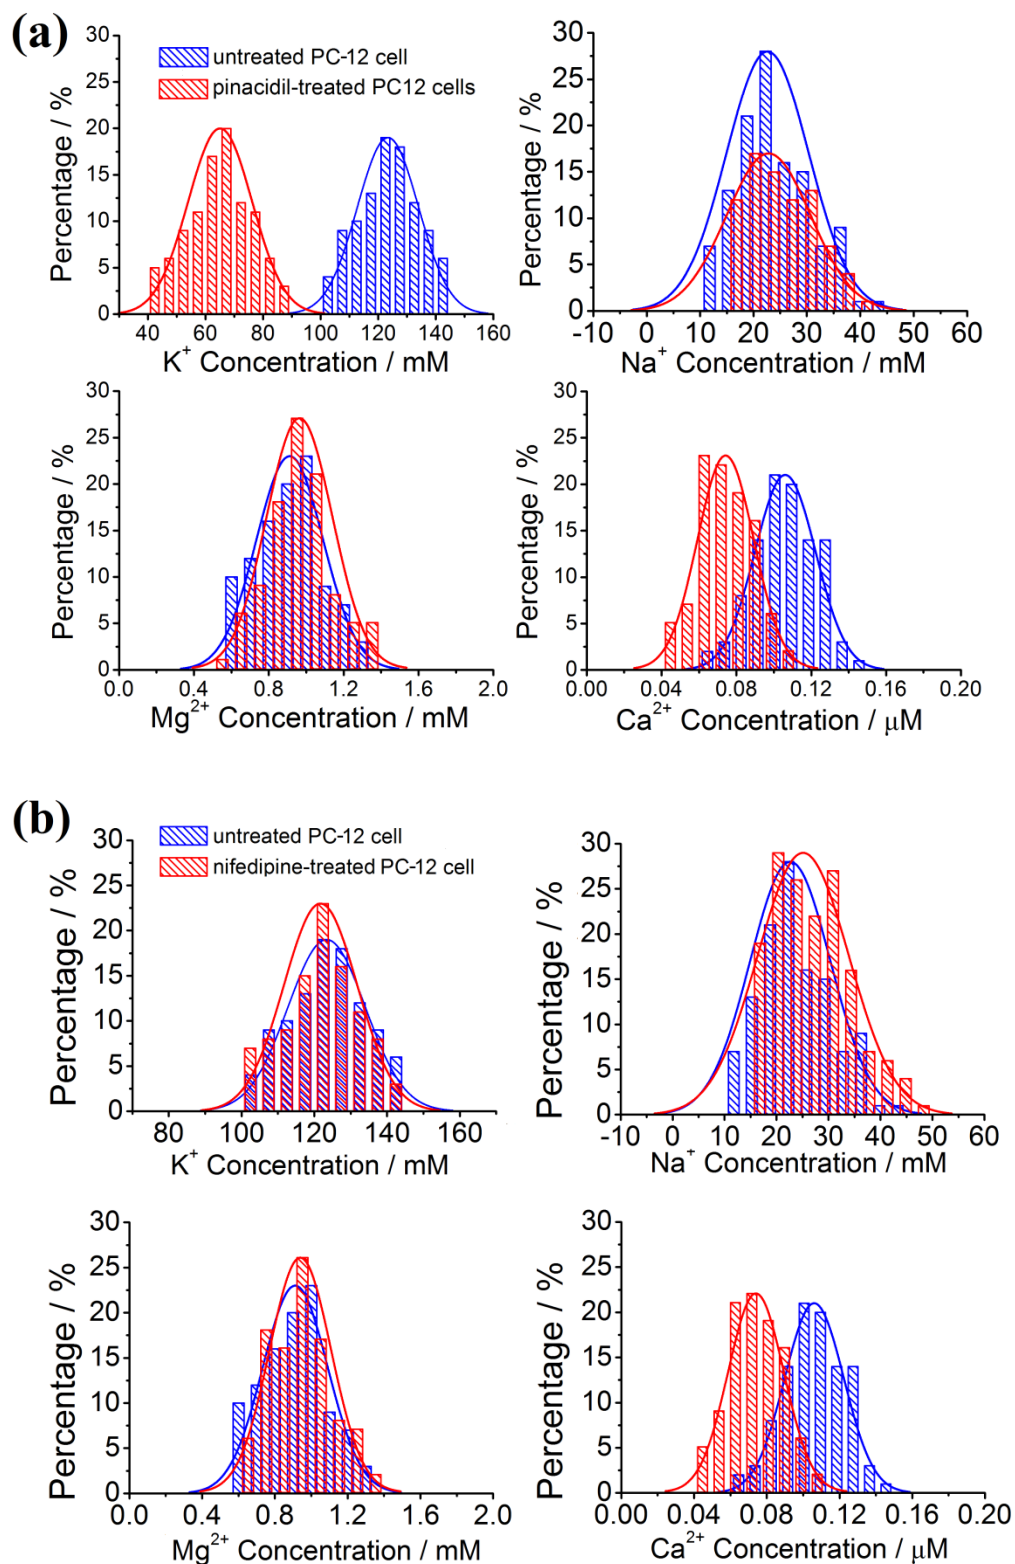

**Figure S6.** The concentration distribution profile of Na<sup>+</sup>, K<sup>+</sup>, Ca<sup>2+</sup> and Mg<sup>2+</sup> in 100 normal PC-12 cells and 100 pinacidil -treated PC-12 cells (A), in 100 normal PC-12 cells and 100 nifedipine-treated PC-12 cells (B).



## 7. Cell viability of the A $\beta$ <sub>25-35</sub>-treated cells.

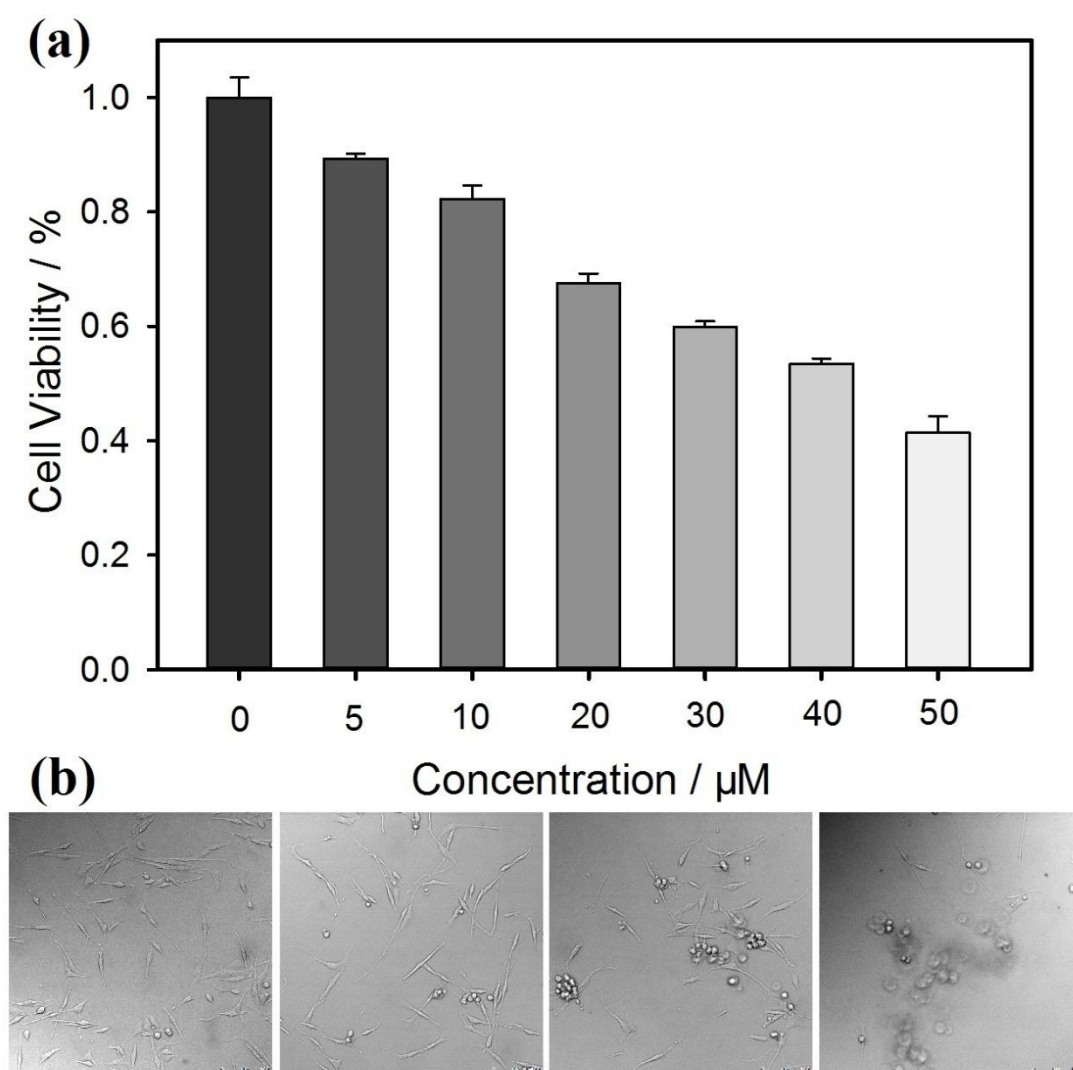

**Figure S7.** Cell viability assay and morphologic changes of A $\beta$ <sub>25-35</sub> treated PC-12 cells: (a), the concentrations of A $\beta$ <sub>25-35</sub> were 0  $\mu$ M, 5  $\mu$ M, 10  $\mu$ M, 20  $\mu$ M, 30  $\mu$ M, 40  $\mu$ M and 50  $\mu$ M. Decreased cell viability occurred at higher A $\beta$ <sub>25-35</sub> concentrations; (b), morphologic changes of A $\beta$ <sub>25-35</sub>-treated PC-12 cells. The concentrations of A $\beta$ <sub>25-35</sub> were 0  $\mu$ M, 10  $\mu$ M, 20  $\mu$ M and 50  $\mu$ M from left to right.

**8. Concentrations of the four ions in A $\beta_{25-35}$ -treated PC-12 cells and untreated PC-12 cells.**

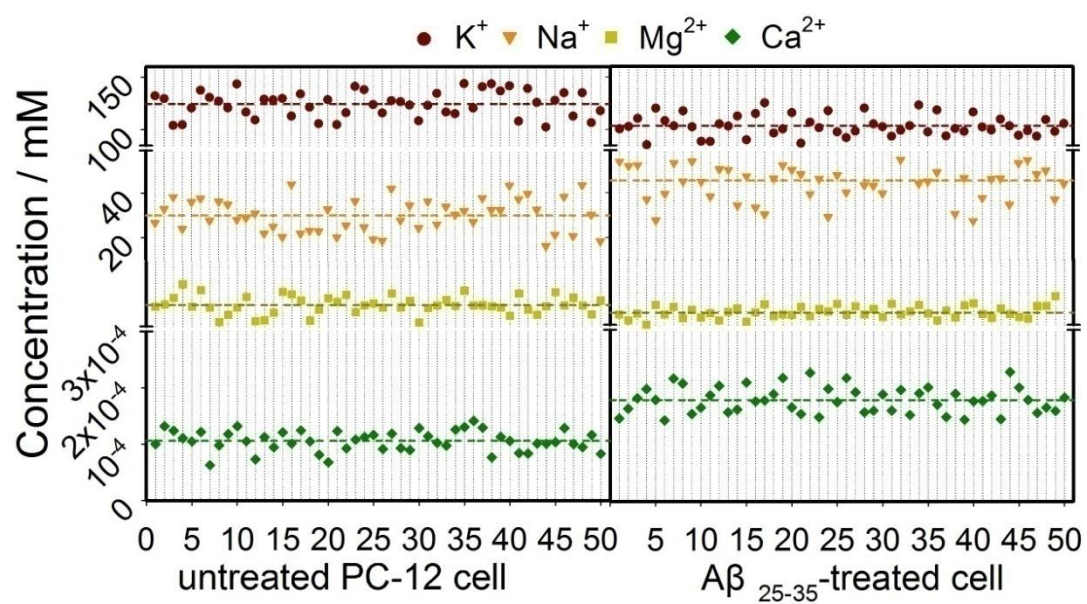

**Figure S8.** The concentrations of Na<sup>+</sup>, K<sup>+</sup>, Ca<sup>2+</sup> and Mg<sup>2+</sup> in 50 individual untreated PC-12 cells and 50 individual A $\beta_{25-35}$ -treated PC-12 cells.

## 9. P-value calculated from the Shapiro-Wilk test

**Table S3.** P-values calculated from the Shapiro-Wilk test of the four metal ions concentrations at pretreatment and posttreatment.\*

| Cells                                           | P-value (K <sup>+</sup> ) | P-value (Na <sup>+</sup> ) | P-value (Ca <sup>2+</sup> ) | P-value (Mg <sup>2+</sup> ) |
|-------------------------------------------------|---------------------------|----------------------------|-----------------------------|-----------------------------|
| Untreated PC-12 cells                           | 0.1206                    | 0.3747                     | 0.3530                      | 0.1607                      |
| Pinacidil-treated PC-12 cells                   | 0.2145                    | 0.1643                     | 0.3015                      | 0.4802                      |
| Nifedipine-treated PC-12 cells                  | 0.07669                   | 0.6153                     | 0.3601                      | 0.07491                     |
| A $\beta$ <sub>25-35</sub> -treated PC-12 cells | 0.1774                    | 0.7374                     | 0.7742                      | 0.2765                      |

\*All the P-values are greater than 0.05, indicating that all the concentrations of the four metal ions obey the normal distribution.

#### 10. $\text{Na}^+/\text{K}^+$ -ATPase activity assay.

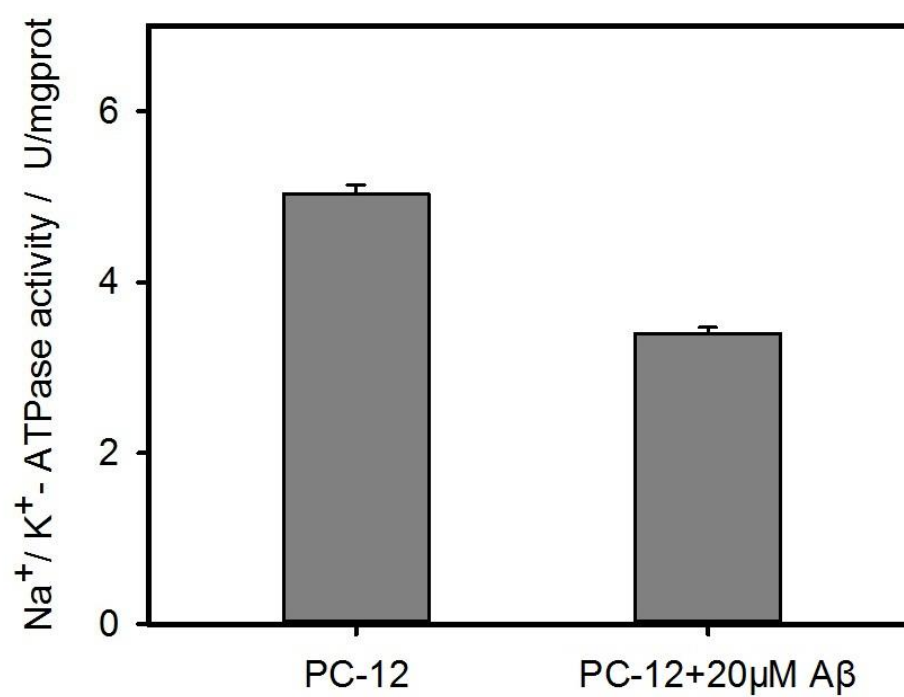

**Figure S9.**  $\text{Na}^+/\text{K}^+$ -ATPase activity assay. The  $\text{Na}^+/\text{K}^+$ -ATPase activity was reduced following the exposure to  $\text{A}\beta_{25-35}$ .

11. Apoptosis Assay.

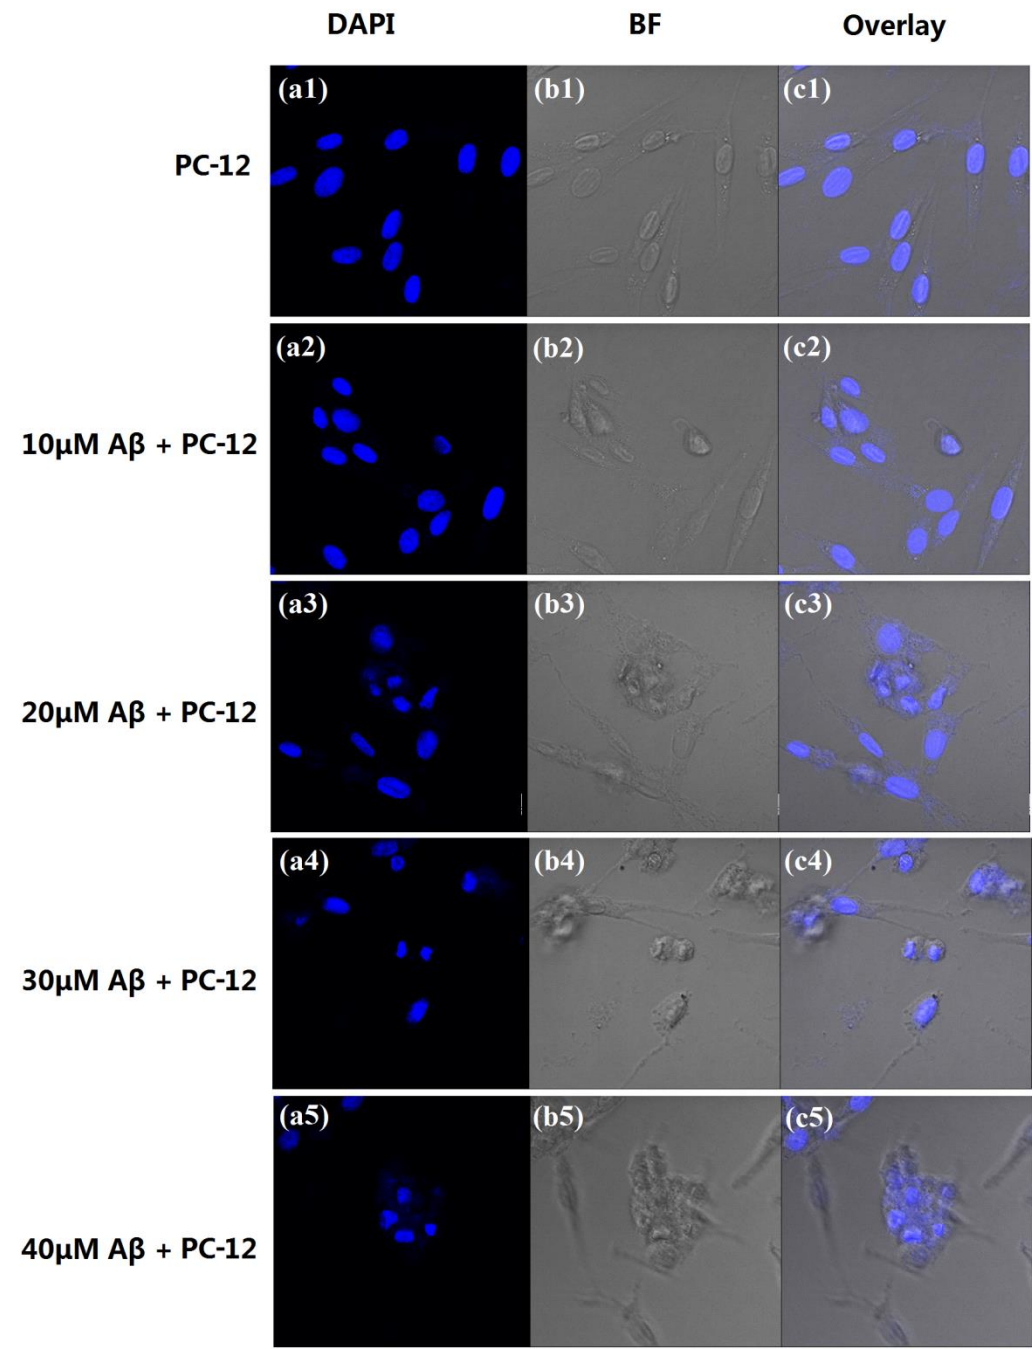

Figure S10. Apoptosis verification assay.
